# Supplementary material
Source: PubMed Central journal article supplement (PMC11105176)

# Supplementary Figure 1

A)

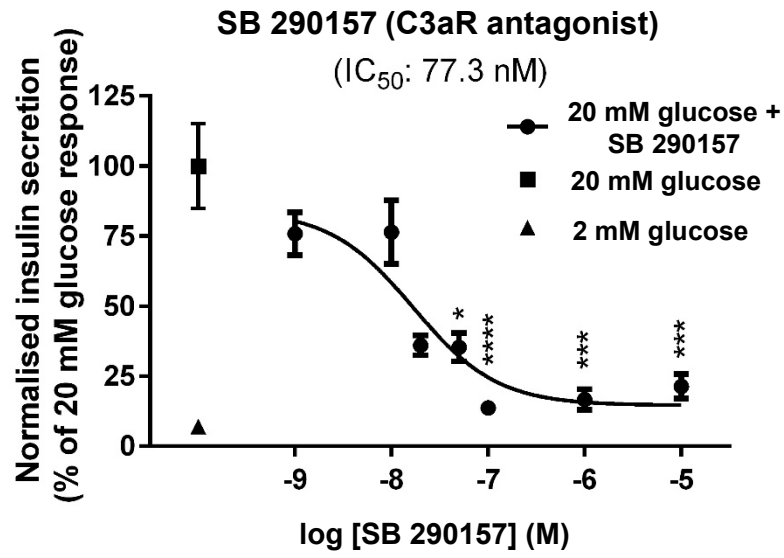

B)

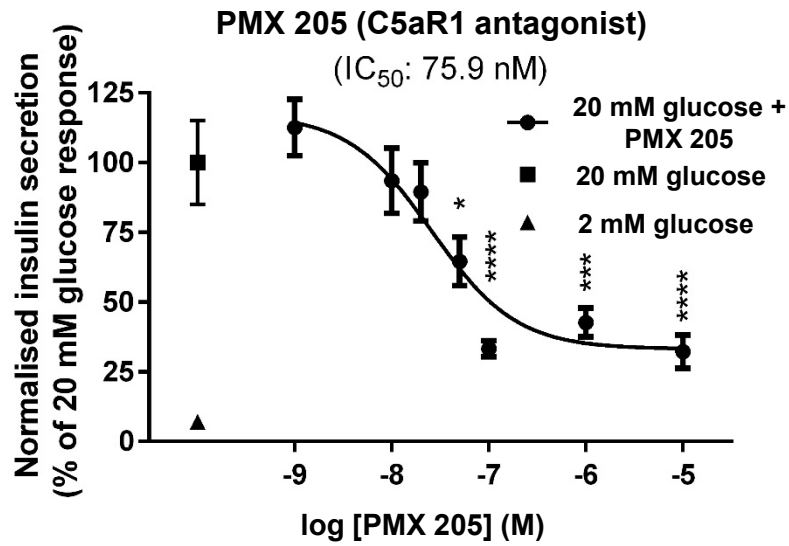

C)

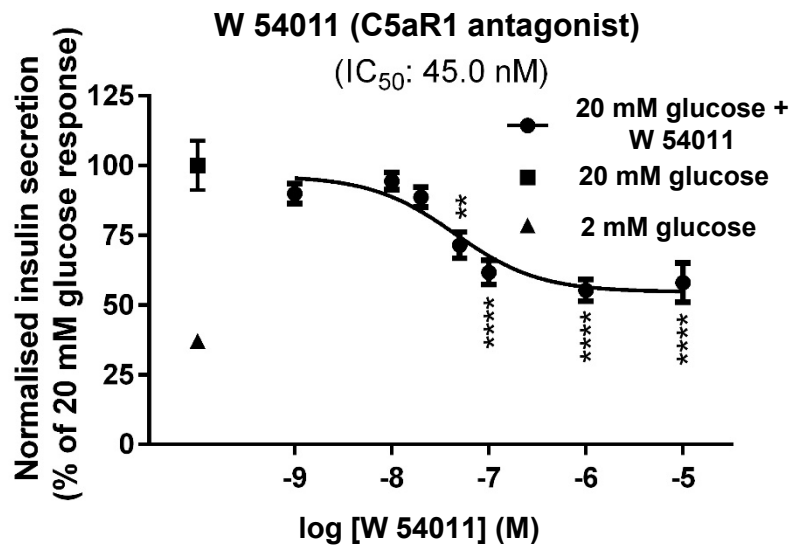

Supplement: 18_2017_2655_MOESM1_ESM.pdf [file 18_2017_2655_MOESM1_ESM.pdf]
