# Supplementary material
Source: PubMed Central journal article supplement (PMC11105176)
Supplement: 18_2017_2655_MOESM2_ESM.pdf [file 18_2017_2655_MOESM2_ESM.pdf]

## Supplementary Table 1

| <b>Gene symbol</b> | <b>Human primer assay</b> | <b>Mouse primer assay</b> |
|--------------------|---------------------------|---------------------------|
| C3aR1              | QT01676941                | QT02380581                |
| C5aR1              | QT00997766                | QT01164723                |
| C5aR2              | QT00243971                | QT02532803                |
| C3                 | QT01680413                | QT00109270                |
| C5/Hc              | QT00088011                | QT00102032                |
| CFD                | QT00212191                | QT01051890                |
| C2                 | QT00059024                | QT00159152                |
| ACTB               | QT01680476                | QT01136772                |
| GAPDH              | QT01192646                | QT01658692                |
| PPIA               | QT01866137                | QT00247709                |
| TBP                | QT00000721                | QT00198443                |
| TFRC               | QT00094850                | QT00122745                |
